# Supplementary material for: Physical Activity in Adolescents Living in Rural and Urban New Caledonia: The Role of Socioenvironmental Factors and the Association With Weight Status
Source: PubMed Central journal article supplement (PMC8378254; doi:10.3389/fpubh.2021.623685), 2021-08-06
Supplement: Table_1.pdf [file Table_1.pdf]

## Physical activity in adolescents living in rural and urban New Caledonia: the role of socioenvironmental factors and the association with weight status

### Supplementary Material

**Table S1. Anthropometric, sociodemographic characteristics and physical activities of the female adolescents according to ethnic community and place of living. Numbers indicate “Mean ± Standard deviation” for the numeric factors (noted with <sup>m</sup>) and “Size (%)” for the categorical factors (noted with <sup>p</sup>).**

|                                    | Melanesian                                            |               |               |              | Caucasian    |               |              |              | Polynesian   |               |               |               |       |
|------------------------------------|-------------------------------------------------------|---------------|---------------|--------------|--------------|---------------|--------------|--------------|--------------|---------------|---------------|---------------|-------|
|                                    | All                                                   | Rural         | Urban         | p-value      | All          | Rural         | Urban        | p-value      | All          | Rural         | Urban         | p-value       |       |
| Number of participants             | 176                                                   | 161           | 15            |              | 91           | 55            | 36           |              | 15           | 5             | 10            |               |       |
| Age (years) <sup>m</sup>           | 13.44 ± 1.21                                          | 13.37 ± 1.18  | 14.17 ± 1.31* | 0.013        | 13.83 ± 1.42 | 13.30 ± 1.24  | 14.64 ± 1.31 | < 0.001      | 13.46 ± 1.86 | 13.18 ± 1.78  | 13.6 ± 1.98   | 0.698         |       |
| SES                                | Low <sup>p</sup>                                      | 101 (57.39)   | 98 (60.87)    | 3 (20.00)    |              | 30 (43.96)    | 24 (43.64)   | 6 (16.67)    |              | 4 (26.67)     | 3 (60.00)     | 1 (10.00)     |       |
|                                    | Intermediate <sup>p</sup>                             | 43 (24.43)    | 36 (22.36)    | 7 (46.67)    | 0.005        | 21 (23.08)    | 10 (18.18)*  | 11 (30.56)   | 0.026        | 5 (33.33)     | 0 (0.00)      | 5 (50.00)     |       |
|                                    | High <sup>p</sup>                                     | 32 (18.18)    | 27 (16.77)    | 5 (33.33)    |              | 40 (43.96)    | 21 (38.18)   | 19 (52.78)   |              | 6 (40.00)     | 2 (40.00)     | 4 (40.00)     |       |
| Anthropometry                      | Height (m) <sup>m</sup>                               | 1.57 ± 0.07   | 1.56 ± 0.07   | 1.59 ± 0.07  | 0.122        | 1.58 ± 0.08   | 1.57 ± 0.08  | 1.61 ± 0.07* | 0.018        | 1.59 ± 0.08   | 1.56 ± 0.07   | 1.6 ± 0.09    | 0.398 |
|                                    | Mass (kg) <sup>m</sup>                                | 55.95 ± 13.41 | 56.37 ± 13.75 | 51.43 ± 7.83 | 0.042        | 54.86 ± 17.14 | 56.8 ± 19.84 | 51.9 ± 11.57 | 0.141        | 61.35 ± 17.15 | 60.86 ± 18.47 | 61.60 ± 17.48 | 0.941 |
|                                    | BMI (kg/m <sup>2</sup> ) <sup>m</sup>                 | 22.67 ± 4.72  | 22.89 ± 4.79  | 20.29 ± 3.01 | 0.041        | 21.75 ± 5.84  | 22.91 ± 6.84 | 19.97 ± 3.19 | 0.041        | 24.00 ± 5.25  | 24.71 ± 6.00  | 23.65 ± 5.14  | 0.726 |
|                                    | IOTF BMI z-score <sup>m</sup>                         | 0.97 ± 1.06   | 1.03 ± 1.05   | 0.24 ± 0.98  | 0.006        | 0.55 ± 1.23   | 0.89 ± 1.25  | 0.02 ± 1.01  | 0.001        | 1.21 ± 1.35   | 1.41 ± 1.34   | 1.11 ± 1.41   | 0.692 |
| IOTF weight status                 | Not overweight <sup>p</sup>                           | 101 (57.39)   | 90 (55.90)    | 11 (73.33)   |              | 68 (74.73)    | 36 (65.45)   | 32 (88.89)   |              | 6 (40.00)     | 1 (20.00)     | 5 (50.00)     |       |
|                                    | Overweight <sup>p</sup>                               | 75 (42.61)    | 71 (44.10)    | 4 (26.67)    | 0.302        | 23 (25.27)    | 19 (34.55)   | 4 (11.11)    | 0.023        | 9 (60.00)     | 4 (80.00)     | 5 (50.00)     |       |
| Physical activity and sitting time | PA (min/day) <sup>m</sup>                             | 113 ± 64      | 115 ± 63*     | 88 ± 75      | 0.118        | 85 ± 67       | 93 ± 75      | 72 ± 49      | 0.462        | 73 ± 43       | 75 ± 64       | 71 ± 31       | 0.862 |
|                                    | Out-of-school sitting time (min/day) <sup>m</sup>     | 164 ± 158     | 166 ± 158     | 156 ± 166    | 0.826        | 295 ± 218     | 271 ± 218    | 332 ± 217    | 0.144        | 152 ± 134     | 96 ± 53       | 180 ± 155     | 0.331 |
|                                    | PA ≥ 60 min/day <sup>p</sup>                          | 129 (73.30)   | 122 (75.78)   | 7 (46.67)    | 0.028        | 48 (52.45)    | 29 (52.73)   | 19 (52.78)   | 1.000        | 9 (60.00)     | 3 (60.00)     | 6 (60.00)     |       |
|                                    | Out-of-school sitting time ≥ 120 min/day <sup>p</sup> | 73 (41.48)    | 66 (40.99)    | 7 (46.67)    | 0.879        | 62 (68.13)    | 33 (60.00)   | 29 (80.56)   | 0.068        | 8 (53.33)     | 2 (40.00)     | 6 (60.00)     |       |
| Socio-environmental factors        | Siblings <sup>m</sup>                                 | 3.9 ± 2.8     | 3.9 ± 2.8     | 3.9 ± 2.7    | 0.885        | 2.1 ± 1.6     | 2.3 ± 1.7    | 1.9 ± 1.3    | 0.679        | 2.6 ± 1.5     | 3.2 ± 1.6     | 2.3 ± 1.5     | 0.288 |
|                                    | Peers <sup>p</sup>                                    | 107 (60.80)   | 101 (62.73)   | 6 (40.00)    | 0.148        | 61 (67.03)    | 37 (67.27)   | 24 (66.67)   | 1.000        | 5 (33.33)     | 1 (20.00)     | 4 (40.00)     |       |
|                                    | Family <sup>p</sup>                                   | 121 (68.75)   | 111 (69.94)   | 10 (66.67)   | 1.000        | 50 (54.95)    | 34 (61.82)   | 16 (44.44)   | 0.158        | 10 (66.67)    | 2 (40.00)     | 8 (80.00)     |       |
|                                    | Safety of area <sup>p</sup>                           | 111 (63.07)   | 103 (63.98)   | 8 (53.33)*   | 0.591        | 54 (59.34)    | 30 (54.55)   | 24 (66.67)   | 0.351        | 11 (73.33)    | 4 (80.00)     | 7 (70.00)     |       |
|                                    | Accessibility of area <sup>p</sup>                    | 119 (67.61)   | 112 (69.57)   | 7 (46.67)    | 0.086        | 77 (84.62)    | 45 (81.82)   | 32 (88.89)   | 0.537        | 10 (66.67)    | 3 (60.00)     | 7 (70.00)     |       |

\* Significant difference between boys and girls (p < 0.05).

<sup>m</sup> Numbers for this line are: Mean ± Standard deviation.

<sup>p</sup> Numbers for this line are: Size (%).
