# Supplementary material for: Physical Activity in Adolescents Living in Rural and Urban New Caledonia: The Role of Socioenvironmental Factors and the Association With Weight Status
Source: PubMed Central journal article supplement (PMC8378254; doi:10.3389/fpubh.2021.623685), 2021-08-06
Supplement: Table_2.pdf [file Table_2.pdf]

**Table S2. Anthropometric, sociodemographic characteristics and physical activities of the male adolescents according to ethnic community and place of living. Numbers indicate “Mean ± Standard deviation” for the numeric factors (noted with <sup>m</sup>) and “Size (%)” for the categorical factors (noted with <sup>p</sup>).**

|                                    |                                                       | Melanesian    |               |               |         | Caucasian     |               |               |         | Polynesian    |               |               |         |
|------------------------------------|-------------------------------------------------------|---------------|---------------|---------------|---------|---------------|---------------|---------------|---------|---------------|---------------|---------------|---------|
|                                    |                                                       | All           | Rural         | Urban         | p-value | All           | Rural         | Urban         | p-value | All           | Rural         | Urban         | p-value |
| Number of participants             |                                                       | 143           | 119           | 24            |         | 67            | 39            | 28            |         | 16            | 5             | 11            |         |
| Age (years) <sup>m</sup>           |                                                       | 13.22 ± 1.25  | 13.25 ± 1.20  | 13.09 ± 1.47  | 0.571   | 13.55 ± 1.62  | 12.99 ± 1.28  | 14.33 ± 1.73  | 0.001   | 12.88 ± 1.82  | 12.97 ± 1.51  | 12.84 ± 2.01  | 0.903   |
| SES                                | Low <sup>p</sup>                                      | 70 (48.95)    | 64 (53.78)    | 6 (25.00)     |         | 14 (20.90)    | 11 (28.21)    | 3 (10.71)     |         | 8 (50.00)     | 3 (60.00)     | 5 (45.45)     |         |
|                                    | Intermediate <sup>p</sup>                             | 40 (27.97)    | 31 (26.05)    | 9 (37.50)     | 0.032   | 23 (34.33)    | 17 (43.59)    | 6 (21.43)     | 0.005   | 4 (25.00)     | 1 (20.00)     | 3 (27.27)     | 1.000   |
|                                    | High <sup>p</sup>                                     | 33 (23.08)    | 24 (20.17)    | 9 (37.50)     |         | 30 (44.78)    | 11 (28.21)    | 19 (67.86)    |         | 4 (25.00)     | 1 (20.00)     | 3 (27.27)     |         |
| Anthropometry                      | Height (m) <sup>m</sup>                               | 1.56 ± 0.09   | 1.56 ± 0.09   | 1.57 ± 0.12   | 0.769   | 1.60 ± 0.12   | 1.55 ± 0.10   | 1.65 ± 0.11   | < 0.001 | 1.63 ± 0.14   | 1.61 ± 0.21   | 1.63 ± 0.11   | 0.822   |
|                                    | Mass (kg) <sup>m</sup>                                | 54.28 ± 16.18 | 54.06 ± 15.67 | 55.35 ± 18.85 | 0.766   | 51.98 ± 15.05 | 51.18 ± 16.51 | 53.09 ± 12.96 | 0.340   | 64.36 ± 21.19 | 69.56 ± 30.48 | 62.00 ± 16.80 | 0.527   |
|                                    | BMI (kg/m <sup>2</sup> ) <sup>m</sup>                 | 22.01 ± 5.29  | 21.95 ± 5.07  | 22.27 ± 6.4   | 0.985   | 20.14 ± 4.48  | 20.79 ± 5.05  | 19.23 ± 3.43  | 0.353   | 23.96 ± 6.69  | 25.80 ± 8.50  | 23.13 ± 5.98  | 0.478   |
|                                    | IOTF BMI z-score <sup>m</sup>                         | 0.95 ± 1.20   | 0.95 ± 1.18   | 0.96 ± 1.32   | 0.962   | 0.37 ± 1.25   | 0.64 ± 1.25   | -0.02 ± 1.16  | 0.031   | 1.31 ± 1.50   | 1.64 ± 1.47   | 1.16 ± 1.56   | 0.567   |
| IOTF weight status                 | Not overweight <sup>p</sup>                           | 89 (62.24)    | 74 (62.18)    | 15 (62.50)    |         | 53 (79.10)    | 28 (71.79)    | 25 (89.29)    |         | 7 (43.75)     | 1 (20.00)     | 6 (54.54)     |         |
|                                    | Overweight <sup>p</sup>                               | 54 (37.76)    | 45 (37.82)    | 9 (37.50)     | 1.000   | 14 (20.90)    | 11 (28.21)    | 3 (10.71)     | 0.152   | 9 (56.25)     | 4 (80.00)     | 5 (45.45)     | 0.308   |
| Physical activity and sitting time | PA (min/day) <sup>m</sup>                             | 127 ± 81      | 133 ± 80      | 95 ± 79       | 0.028   | 101 ± 76      | 97 ± 81       | 108 ± 68      | 0.239   | 80 ± 52       | 69 ± 44       | 86 ± 57       | 0.561   |
|                                    | Out-of-school sitting time (min/day) <sup>m</sup>     | 167 ± 166     | 170 ± 171     | 152 ± 144     | 0.862   | 239 ± 166     | 231 ± 152     | 251 ± 185     | 0.898   | 229 ± 205     | 180 ± 127     | 251 ± 233     | 0.818   |
|                                    | PA ≥ 60 min/day <sup>p</sup>                          | 100 (69.93)   | 89 (74.79)    | 11 (45.83)    | 0.010   | 42 (62.69)    | 25 (64.10)    | 17 (60.71)    | 0.979   | 8 (50.00)     | 2 (40.00)     | 6 (54.55)     | 1.000   |
|                                    | Out-of-school sitting time ≥ 120 min/day <sup>p</sup> | 62 (43.36)    | 51 (42.86)    | 11 (45.83)    | 0.966   | 50 (74.63)    | 28 (71.79)    | 22 (78.57)    | 0.731   | 12 (75.00)    | 3 (60.00)     | 9 (81.82)     | 0.547   |
| Socio-environmental factors        | Siblings <sup>m</sup>                                 | 3.3 ± 2.4     | 3.4 ± 2.5     | 2.3 ± 1.7     | 0.016   | 2.1 ± 1.5     | 2.6 ± 1.7     | 1.4 ± 0.7     | 0.001   | 2.6 ± 1.3     | 2.6 ± 0.5     | 2.5 ± 1.5     | 1.000   |
|                                    | Peers <sup>p</sup>                                    | 89 (62.24)    | 76 (63.87)    | 13 (54.17)    | 0.507   | 42 (62.69)    | 25 (64.10)    | 17 (60.71)    | 0.979   | 10 (62.5)     | 2 (40.00)     | 8 (72.73)     | 0.300   |
|                                    | Family <sup>p</sup>                                   | 83 (58.04)    | 73 (61.34)    | 10 (41.67)    | 0.120   | 29 (43.28)    | 19 (48.72)    | 10 (35.71)    | 0.418   | 8 (50.00)     | 3 (60.00)     | 5 (45.45)     | 1.000   |
|                                    | Safety of area <sup>p</sup>                           | 104 (72.73)   | 83 (69.75)    | 21 (87.50)    | 0.126   | 40 (59.70)    | 21 (53.85)    | 19 (67.86)    | 0.368   | 7 (43.75)     | 2 (40.00)     | 5 (45.45)     | 1.000   |
|                                    | Accessibility of area <sup>p</sup>                    | 109 (76.22)   | 91 (76.47)    | 18 (75.00)    | 1.000   | 57 (85.07)    | 33 (84.62)    | 24 (85.71)    | 1.000   | 8 (50.00)     | 4 (80.00)     | 4 (36.36)     | 0.282   |

<sup>m</sup> Numbers for this line are: Mean ± Standard deviation.

<sup>p</sup> Numbers for this line are: Size (%).
