# Supplementary material for: Physical Activity in Adolescents Living in Rural and Urban New Caledonia: The Role of Socioenvironmental Factors and the Association With Weight Status
Source: PubMed Central journal article supplement (PMC8378254; doi:10.3389/fpubh.2021.623685), 2021-08-06
Supplement: Table_3.pdf [file Table_3.pdf]

**Table S3. P-values of overall tests (One-way ANOVA or Kruskal-Wallis test for numeric variables – noted with <sup>m</sup> – and  $\chi^2$  or Fisher’s exact test for categorical variables – noted with <sup>p</sup>) and post-hoc tests for ethnic community comparison according to place of living in female adolescents.**

|                                                       | All                       |               |       |       | Rural                     |               |       |       | Urban                     |               |       |       |
|-------------------------------------------------------|---------------------------|---------------|-------|-------|---------------------------|---------------|-------|-------|---------------------------|---------------|-------|-------|
|                                                       | Overall test <sup>*</sup> | Post-hoc test |       |       | Overall test <sup>*</sup> | Post-hoc test |       |       | Overall test <sup>*</sup> | Post-hoc test |       |       |
|                                                       |                           | M-C           | M-P   | C-P   |                           | M-C           | M-P   | C-P   |                           | M-C           | M-P   | C-P   |
| Age (years) <sup>m</sup>                              | 0.067 <sup>S</sup>        |               |       |       | 0.890 <sup>S</sup>        |               |       |       | 0.119 <sup>M</sup>        |               |       |       |
| SES <sup>p</sup>                                      | < 0.001 <sup>M</sup>      | < 0.001       | 0.116 | 1.000 | 0.011 <sup>M</sup>        | 0.019         | 0.603 | 1.000 | 0.640 <sup>S</sup>        |               |       |       |
| Height (m) <sup>m</sup>                               | 0.208 <sup>S</sup>        |               |       |       | 0.975 <sup>S</sup>        |               |       |       | 0.872 <sup>S</sup>        |               |       |       |
| Mass (kg) <sup>m</sup>                                | 0.050 <sup>S</sup>        |               |       |       | 0.388 <sup>S</sup>        |               |       |       | 0.067 <sup>M</sup>        |               |       |       |
| BMI (kg/m <sup>2</sup> ) <sup>m</sup>                 | 0.184 <sup>S</sup>        |               |       |       | 0.289 <sup>S</sup>        |               |       |       | 0.017 <sup>M</sup>        | 0.951         | 0.058 | 0.013 |
| IOTF BMI z-score <sup>m</sup>                         | 0.008 <sup>S</sup>        | 0.011         | 0.694 | 0.086 | 0.504 <sup>S</sup>        |               |       |       | 0.023 <sup>M</sup>        | 0.773         | 0.127 | 0.017 |
| IOTF weight status <sup>p</sup>                       | 0.004 <sup>S</sup>        | 0.024         | 0.907 | 0.038 | 0.107 <sup>S</sup>        |               |       |       | 0.025 <sup>M</sup>        | 0.638         | 1.000 | 0.045 |
| PA (min/day) <sup>m</sup>                             | < 0.001 <sup>S</sup>      | < 0.001       | 0.060 | 0.977 | 0.014 <sup>S</sup>        | 0.018         | 0.406 | 0.880 | 0.933 <sup>S</sup>        |               |       |       |
| Out-of-school sitting time <sup>m</sup>               | < 0.001 <sup>M</sup>      | < 0.001       | 0.941 | 0.074 | 0.008 <sup>S</sup>        | 0.008         | 0.854 | 0.164 | 0.010 <sup>M</sup>        | 0.019         | 0.735 | 0.119 |
| PA ≥ 60 min/day <sup>p</sup>                          | 0.003 <sup>M</sup>        | 0.003         | 1.000 | 1.000 | 0.005 <sup>M</sup>        | 0.006         | 1.000 | 1.000 | 0.826 <sup>S</sup>        |               |       |       |
| Out-of-school sitting time ≥ 120 min/day <sup>p</sup> | < 0.001 <sup>S</sup>      | < 0.001       | 1.00  | 1.000 | 0.046 <sup>S</sup>        | 0.067         | 1.000 | 1.000 | 0.046 <sup>M</sup>        | 0.067         | 1.000 | 0.659 |
| Siblings <sup>m</sup>                                 | < 0.001 <sup>M</sup>      | < 0.001       | 0.280 | 0.290 | < 0.001 <sup>M</sup>      | < 0.001       | 0.960 | 0.340 | 0.039 <sup>M</sup>        | 0.032         | 0.507 | 0.602 |
| Peers <sup>p</sup>                                    | 0.044 <sup>M</sup>        | 1.000         | 0.216 | 0.082 | 0.116 <sup>S</sup>        |               |       |       | 0.123 <sup>M</sup>        |               |       |       |
| Family <sup>p</sup>                                   | 0.081 <sup>S</sup>        |               |       |       | 0.255 <sup>S</sup>        |               |       |       | 0.099 <sup>M</sup>        |               |       |       |
| Safety of area <sup>p</sup>                           | 0.560 <sup>S</sup>        |               |       |       | 0.355 <sup>S</sup>        |               |       |       | 0.701 <sup>S</sup>        |               |       |       |
| Accessibility of area <sup>p</sup>                    | 0.007 <sup>S</sup>        | 0.010         | 1.000 | 0.417 | 0.131 <sup>S</sup>        |               |       |       | 0.004 <sup>L</sup>        | 0.008         | 1.000 | 0.490 |

In the “Post-hoc test” columns: “M-C” sub-columns mean comparison between Melanesians and Caucasians, “M-P” sub-columns mean comparison between Melanesians and Polynesians and “C-P” sub-columns mean comparison between Caucasians and Polynesians.

<sup>m</sup> Numerical factors.

<sup>p</sup> Categorical factors.

\* Superscript letters inform about the effect size magnitude: small (S), moderate (M) and large (L).
