# Supplementary material for: Physical Activity in Adolescents Living in Rural and Urban New Caledonia: The Role of Socioenvironmental Factors and the Association With Weight Status
Source: PubMed Central journal article supplement (PMC8378254; doi:10.3389/fpubh.2021.623685), 2021-08-06
Supplement: Table_4.pdf [file Table_4.pdf]

**Table S4. P-values of overall tests (One-way ANOVA or Kruskal-Wallis test for numeric variables – noted with <sup>m</sup> – and  $\chi^2$  or Fisher’s exact test for categorical variables– noted with <sup>p</sup>) and post-hoc tests for ethnic community comparison according to place of living in male adolescents.**

|                                                            | All                       |               |       | Rural                     |                    |       | Urban                     |               |                    |       |       |       |
|------------------------------------------------------------|---------------------------|---------------|-------|---------------------------|--------------------|-------|---------------------------|---------------|--------------------|-------|-------|-------|
|                                                            | Overall test <sup>*</sup> | Post-hoc test |       | Overall test <sup>*</sup> | Post-hoc test      |       | Overall test <sup>*</sup> | Post-hoc test |                    |       |       |       |
|                                                            |                           | M-C           | M-P   | C-P                       |                    | M-C   | M-P                       | C-P           | M-C                | M-P   | C-P   |       |
| Age (years) <sup>m</sup>                                   | 0.208 <sup>S</sup>        |               |       |                           | 0.487 <sup>S</sup> |       |                           |               | 0.011 <sup>M</sup> | 0.027 | 0.915 | 0.041 |
| SES <sup>p</sup>                                           | 0.001 <sup>M</sup>        | 0.001         | 1.000 | 0.204                     | 0.051 <sup>M</sup> |       |                           |               | 0.057 <sup>L</sup> |       |       |       |
| Height (m) <sup>m</sup>                                    | 0.023 <sup>S</sup>        | 0.092         | 0.083 | 0.676                     | 0.860 <sup>S</sup> |       |                           |               | 0.022 <sup>M</sup> | 0.018 | 0.250 | 0.844 |
| Mass (kg) <sup>m</sup>                                     | 0.025 <sup>S</sup>        | 0.594         | 0.048 | 0.017                     | 0.063 <sup>S</sup> |       |                           |               | 0.305 <sup>S</sup> |       |       |       |
| BMI (kg/m <sup>2</sup> ) <sup>m</sup>                      | 0.009 <sup>S</sup>        | 0.038         | 0.313 | 0.021                     | 0.105 <sup>S</sup> |       |                           |               | 0.045 <sup>M</sup> | 0.096 | 0.891 | 0.095 |
| IOTF BMI z-score <sup>m</sup>                              | 0.002 <sup>S</sup>        | 0.004         | 0.503 | 0.017                     | 0.151 <sup>S</sup> |       |                           |               | 0.009 <sup>L</sup> | 0.023 | 0.908 | 0.035 |
| IOTF weight status <sup>p</sup>                            | 0.007 <sup>S</sup>        | 0.053         | 0.546 | 0.031                     | 0.067 <sup>S</sup> |       |                           |               | 0.024 <sup>M</sup> | 0.135 | 1.000 | 0.083 |
| PA (min/day) <sup>m</sup>                                  | 0.017 <sup>S</sup>        | 0.061         | 0.085 | 0.767                     | 0.008 <sup>S</sup> | 0.018 | 0.164                     | 0.953         | 0.614 <sup>S</sup> |       |       |       |
| Out-of-school sitting time <sup>m</sup>                    | 0.001 <sup>S</sup>        | 0.001         | 0.151 | 0.971                     | 0.024 <sup>S</sup> | 0.019 | 0.830                     | 0.755         | 0.085 <sup>S</sup> |       |       |       |
| PA $\geq$ 60 min/day <sup>p</sup>                          | 0.208 <sup>S</sup>        |               |       |                           | 0.105 <sup>S</sup> |       |                           |               | 0.562 <sup>S</sup> |       |       |       |
| Out-of-school sitting time $\geq$ 120 min/day <sup>p</sup> | < 0.001 <sup>M</sup>      | < 0.001       | 0.097 | 1.000                     | 0.004 <sup>M</sup> | 0.009 | 1.000                     | 1.000         | 0.030 <sup>M</sup> | 0.093 | 0.208 | 1.000 |
| Siblings <sup>m</sup>                                      | < 0.001 <sup>M</sup>      | < 0.001       | 0.637 | 0.168                     | 0.072 <sup>S</sup> |       |                           |               | 0.029 <sup>M</sup> | 0.110 | 0.800 | 0.040 |
| Peers <sup>p</sup>                                         | 0.998 <sup>S</sup>        |               |       |                           | 0.577 <sup>S</sup> |       |                           |               | 0.624 <sup>S</sup> |       |       |       |
| Family <sup>p</sup>                                        | 0.122 <sup>S</sup>        |               |       |                           | 0.379 <sup>S</sup> |       |                           |               | 0.836 <sup>S</sup> |       |       |       |
| Safety of area <sup>p</sup>                                | 0.022 <sup>S</sup>        | 0.237         | 0.068 | 0.822                     | 0.379 <sup>S</sup> |       |                           |               | 0.032 <sup>M</sup> | 0.338 | 0.044 | 0.832 |
| Accessibility of area <sup>p</sup>                         | 0.013 <sup>S</sup>        | 0.454         | 0.105 | 0.015                     | 0.639 <sup>S</sup> |       |                           |               | 0.010 <sup>L</sup> | 1.000 | 0.171 | 0.013 |

In the “Post-hoc test” columns: “M-C” sub-columns mean comparison between Melanesians and Caucasians, “M-P” sub-columns mean comparison between Melanesians and Polynesians and “C-P” sub-columns mean comparison between Caucasians and Polynesians.

<sup>m</sup> Numerical factors.

<sup>p</sup> Categorical factors.

\* Superscript letters inform about the effect size magnitude: small (S), moderate (M) and large (L).
